# Supplementary material for: Stimulation of CCK and GLP-1 secretion and expression in STC-1 cells by human jejunal contents and in vitro gastrointestinal digests from casein and whey proteins
Source: Royal Society of Chemistry journal article supplement (doi:10.1039/c8fo01059e), 2018-01-01
Supplement: c8fo01059e1.pdf [file c8fo01059e1.pdf]

**Stimulation of CCK and GLP-1 secretion and expression in STC-1 cells by  
human jejunal contents and *in vitro* gastrointestinal digests from casein  
and whey proteins**

Marta Santos-Hernández<sup>1</sup>, Daniel Tomé<sup>2</sup>, Claire Gaudichon<sup>2</sup>, Isidra Recio<sup>1\*</sup>

<sup>1</sup>Instituto de Investigación en Ciencias de la Alimentación, CIAL (CSIC-UAM, CEI UAM+CSIC),  
Nicolás Cabrera, 9, 28049 Madrid, Spain.

<sup>2</sup>AgroParisTech\_UMR0914 Physiologie de la Nutrition et du Comportement Alimentaire, 16 rue  
Claude Bernard, 75005 Paris, France.

\* Corresponding author: I. Recio

Nicolás Cabrera, 9. 28049 Madrid, Spain

Phone: +34 910017940

Fax: +34 910017905

e-mail: [i.recio@csic.es](mailto:i.recio@csic.es)

## 1. SDS-PAGE ANALYSIS

The methodology is described in the manuscript

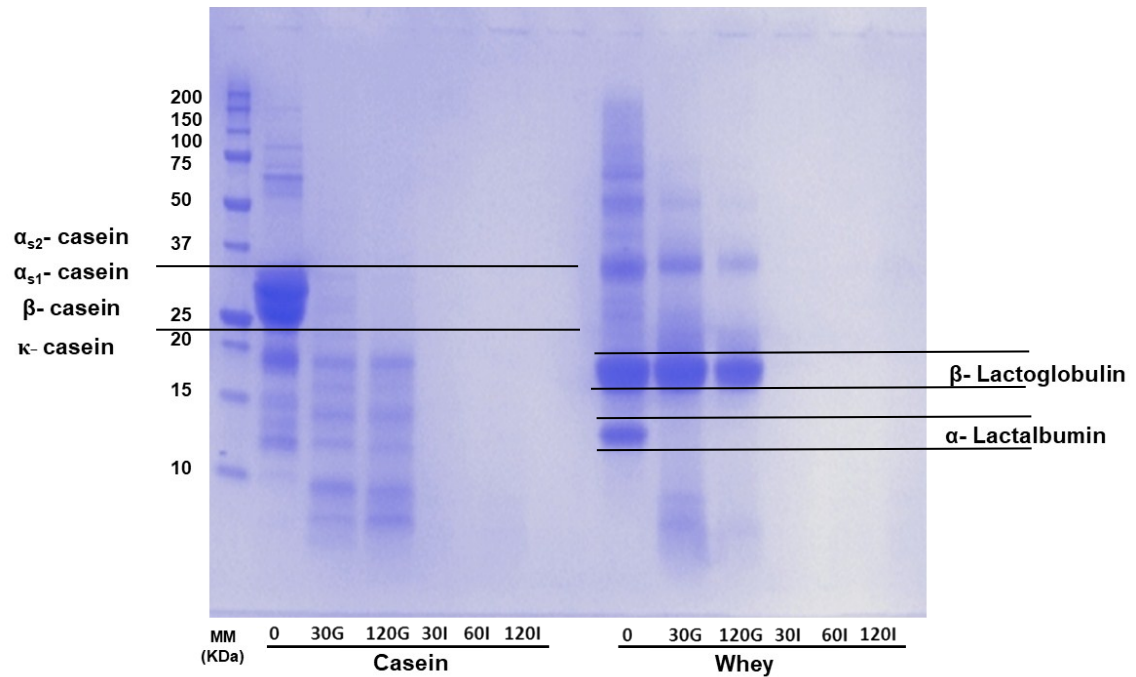

**Figure S1:** SDS-PAGE analysis of casein and whey *in vitro* gastrointestinal digests. Each lane corresponds to a different time points of gastric (G) and gastrointestinal (I) digestion. MM, molecular weight marker; 30G, 30 min gastric digestion; 120G, 120 min gastric digestion; 30I, 30 min gastrointestinal digestion; and 120I, 120 min gastrointestinal digestion.

## 2. Analysis by HPLC-tandem mass spectrometry

**Table S1.**  $\beta$ -casein-derived peptides identified in casein *in vitro* digests taken at 30 and 120 min of the gastric phase, and 30 and 120 min of the intestinal phase

| Range | Sequence                          | Range   | Sequence                         |
|-------|-----------------------------------|---------|----------------------------------|
| 1 5   | RELEE                             | 48 58   | KIHPFAQTQSL                      |
| 1 6   | RELEEL                            | 55 86   | TQSLVYFPFGPIPNLSLQNIPLTQTTPVVVPP |
| 1 11  | RELEELNVPGE                       | 57 62   | SLVYPF                           |
| 2 8   | ELEELNV                           | 57 66   | SLVYFPFGPI                       |
| 5 17  | ELNVPGEIVESLS                     | 57 68   | SLVYFPFGPIPN                     |
| 5 34  | ELNVPGEIVESLSSEESITRINKKIEKFQ     | 58 66   | LVYFPFGPI                        |
| 6 12  | LNVPGEI                           | 58 68   | LVYFPFGPIPN                      |
| 6 14  | LNVPGEIVE                         | 59 66   | VYFPFGPI                         |
| 6 16  | LNVPGEIVESL                       | 59 68   | VYFPFGPIPN                       |
| 6 26  | LNVPGEIVESLSSEESITRI              | 59 80   | VYFPFGPIPNLSLQNIPLTQT            |
| 7 13  | NVPGEIV                           | 60 66   | YFPFGPI                          |
| 7 14  | NVPGEIVE                          | 60 68   | YFPFGPIPN                        |
| 7 15  | NVPGEIVES                         | 61 68   | PFPFGPIPN                        |
| 7 16  | NVPGEIVESL                        | 61 71   | PFPFGPIPNSLP                     |
| 7 35  | NVPGEIVESLSSEESITRINKKIEKFQS      | 61 78   | PFPFGPIPNLSLQNIPLTQT             |
| 7 41  | NVPGEIVESLSSEESITRINKKIEKFQSEEQQT | 67 74   | PNSLQNI                          |
| 8 37  | VPGEIVESLSSEESITRINKKIEKFQSEE     | 69 80   | SLPQNIPLTQT                      |
| 9 14  | PGEIVE                            | 69 82   | SLPQNIPLTQTPV                    |
| 9 26  | PGEIVESLSSEESITRI                 | 70 80   | LPQNIPLTQT                       |
| 11 20 | EIVESLSSE                         | 71 93   | PQNIPLTQTTPVVVPPFLQPEVM          |
| 12 24 | IVESLSSEESIT                      | 73 80   | NIPPLTQT                         |
| 16 39 | LSSSEESITRINKKIEKFQSEEQQ          | 73 82   | NIPPLTQTPV                       |
| 17 26 | SSSEESITRI                        | 73 92   | NIPPLTQTPVVVPPFLQPEV             |
| 32 38 | KFQSEEQ                           | 75 82   | PPLTQTPV                         |
| 33 38 | FQSEEQ                            | 76 83   | PLTQTPVV                         |
| 33 39 | FQSEEQQ                           | 78 82   | TQTPV                            |
| 33 40 | FQSEEQQQ                          | 78 85   | TQTPVVVP                         |
| 34 39 | QSEEQQ                            | 78 87   | TQTPVVVPPF                       |
| 35 44 | SEEQQTEDE                         | 81 92   | PVVVPPFLQPEV                     |
| 36 61 | KVNELSKDIGSESTEDQAMEDIKQME        | 81 93   | PVVVPPFLQPEVM                    |
| 40 45 | QTEDEL                            | 83 91   | VVPPFLQPE                        |
| 40 55 | LSKDIGSESTEDQAME                  | 83 92   | VVPPFLQPEV                       |
| 41 45 | TEDEL                             | 85 92   | PPFLQPEV                         |
| 41 47 | TEDELQD                           | 91 99   | EVMGVSKVK                        |
| 41 48 | TEDELQDK                          | 92 99   | VMGVSKVK                         |
| 42 47 | EDELQD                            | 92 100  | VMGVSKVKE                        |
| 43 48 | DELQDK                            | 100 105 | EAMAPK                           |
| 45 58 | LQDKIHPFAQTQSL                    | 108 113 | EMPPFK                           |
| 46 55 | QDKIHPFAQT                        | 108 116 | EMPPFKYPV                        |
| 46 58 | QDKIHPFAQTQSL                     | 114 118 | YPVEP                            |
| 47 55 | DKIHPFAQT                         | 114 119 | YPVEPF                           |
| 47 74 | ESTEDQAMEDIKQMEAESISSSEIIVPN      | 117 136 | EPFTESQSLTLTDVENLHLP             |

| Range   | Sequence                       | Range   | Sequence                      |
|---------|--------------------------------|---------|-------------------------------|
| 118 126 | PFTESQSLT                      | 159 167 | PQSVLSLSQ                     |
| 119 125 | FTESQSL                        | 159 184 | PQSVLSLSQSKVLPVPQKAVPYPQRD    |
| 125 140 | LTLTDVENLHLPPLL                | 160 168 | QSVLSLSQS                     |
| 125 142 | LTLTDVENLHLPPLLQS              | 161 171 | SVLSLSQSKVL                   |
| 126 132 | TLTDVEN                        | 162 170 | VLSLSQSKV                     |
| 126 140 | TLTDVENLHLPPLL                 | 162 172 | VLSLSQSKVLP                   |
| 126 142 | TLTDVENLHLPPLLQS               | 162 190 | GAWYVPLGTQYTDAPSFSDIPNPIGSEN  |
| 127 132 | LTDVEN                         | 164 173 | SLSQSKVLPV                    |
| 127 139 | LTDVENLHLPPL                   | 164 188 | SLSQSKVLPVPQKAVPYPQRDMPIQ     |
| 127 140 | LTDVENLHLPPLL                  | 164 189 | SLSQSKVLPVPQKAVPYPQRDMPIQA    |
| 127 142 | LTDVENLHLPPLLQS                | 164 190 | SLSQSKVLPVPQKAVPYPQRDMPIQAF   |
| 128 140 | TDVENLHLPPLL                   | 164 191 | SLSQSKVLPVPQKAVPYPQRDMPIQAFLL |
| 128 142 | TDVENLHLPPLLQS                 | 164 192 | SLSQSKVLPVPQKAVPYPQRDMPIQAFLL |
| 128 146 | TDVENLHLPPLLQSWMHQ             | 165 172 | LSQSKVLP                      |
| 129 138 | DVENLHLP                       | 168 196 | SKVLPVPQKAVPYPQRDMPIQAFLLYQEP |
| 129 139 | DVENLHLPPL                     | 170 175 | VLPVPQ                        |
| 130 138 | VENLHLP                        | 173 188 | VPQKAVPYPQRDMPIQ              |
| 134 139 | HLPLPL                         | 177 182 | AVPYPQ                        |
| 134 141 | HLPLPLLQ                       | 184 189 | DMPIQA                        |
| 141 163 | QSWMHQPHQPLPPTVMFPPQSVL        | 189 205 | AFLLYQEPVLGPPVRGPF            |
| 141 170 | QSWMHQPHQPLPPTVMFPPQSVLSLSQSKV | 190 209 | FLLYQEPVLGPPVRGPFPIIV         |
| 143 156 | WMHQPPLPPTVM                   | 191 209 | LLYQEPVLGPPVRGPFPIIV          |
| 144 154 | MHQPPLPPT                      | 192 201 | LYQEPVLGPV                    |
| 145 154 | HQPPLPPT                       | 192 209 | LYQEPVLGPPVRGPFPIIV           |
| 147 154 | PHQPPLPPT                      | 193 197 | YQEPV                         |
| 149 154 | QPLPPT                         | 193 198 | YQEPVL                        |
| 154 164 | TVMFPPQSVLS                    | 193 201 | YQEPVLGPV                     |
| 156 162 | MFPQSV                         | 193 208 | YQEPVLGPPVRGPFPII             |
| 157 162 | FPPQSV                         | 193 209 | YQEPVLGPPVRGPFPIIV            |
| 157 163 | FPPQSVL                        | 194 201 | QEPVLGPV                      |
| 157 165 | FPPQSVLSL                      | 196 209 | PVLGPPVRGPFPIIV               |
|         |                                | 202 207 | RGPFPI                        |

**Table S2.**  $\alpha_{s1}$ - casein-derived peptides identified in casein *in vitro* digests taken at 30 and 120 min of the gastric phase, and 30 and 120 min of the intestinal phase

| Range | Sequence                              | Range   | Sequence                          |
|-------|---------------------------------------|---------|-----------------------------------|
| 1 16  | RPKHPIKHQGLPQEV                       | 70 74   | EIVPN                             |
| 1 20  | RPKHPIKHQGLPQEVLNENL                  | 83 88   | KEDVPS                            |
| 1 23  | RPKHPIKHQGLPQEVLNENLLRF               | 84 89   | EDVPSE                            |
| 2 11  | PKHPIKHQGL                            | 87 95   | PSERYLGYL                         |
| 6 12  | IKHQGLP                               | 87 104  | PSERYLGYLEQLLRLLKKY               |
| 8 13  | HQGLPQ                                | 96 114  | EQLLRLLKKYKVPQLEIVPN              |
| 12 19 | PQEVLNEN                              | 97 103  | QLLRLLKK                          |
| 16 20 | LNENL                                 | 98 129  | LLRLLKKYKVPQLEIVPNSAEERLHSMKEGIHA |
| 17 23 | NENLLRF                               | 99 109  | LRLKKYKVPQL                       |
| 24 30 | FVAPFPE                               | 100 129 | RLKKYKVPQLEIVPNSAEERLHSMKEGIHA    |
| 24 31 | FVAPFPEV                              | 102 107 | KKYKVP                            |
| 24 33 | FVAPFPEVFG                            | 103 107 | KYKVP                             |
| 24 39 | FVAPFPEVFGKEKVNE                      | 104 109 | YKVPQL                            |
| 25 30 | VAPFPE                                | 105 112 | KVPQLEIV                          |
| 25 31 | VAPFPEV                               | 109 114 | LEIVPN                            |
| 25 33 | VAPFPEVFG                             | 109 118 | LEIVPNSAEE                        |
| 25 39 | VAPFPEVFGKEKVNE                       | 110 118 | EIVPNSAEE                         |
| 26 39 | APFPEVFGKEKVNE                        | 111 118 | IVPNSAEE                          |
| 27 31 | PFPEV                                 | 112 118 | VPNSAEE                           |
| 27 39 | PFPEVFGKEKVNE                         | 114 119 | NSAEER                            |
| 29 39 | PEVFGKEKVNE                           | 120 125 | LHSMKE                            |
| 33 39 | GKEKVNE                               | 124 131 | KEGIHAQQ                          |
| 35 39 | EKVNE                                 | 125 129 | EGIHA                             |
| 35 45 | EKVNELSKDIG                           | 128 134 | HAQQKEP                           |
| 36 41 | KVNELS                                | 133 138 | EPMIGV                            |
| 38 44 | NELSKDI                               | 133 140 | EPMIGVNQ                          |
| 40 47 | LSKDIGSE                              | 135 145 | MIGVNQELAYF                       |
| 40 56 | LSKDIGSESTEDQAMED                     | 136 141 | IGVNQE                            |
| 41 77 | SKDIGSESTEDQAMEDIKQMEAESISSSEEIVPNSVE | 136 149 | IGVNQELAYFYPEL                    |
| 43 51 | DIGSESTED                             | 138 145 | VNQELAYF                          |
| 43 52 | DIGSESTEDQ                            | 142 149 | LAYFYPEL                          |
| 43 53 | DIGSESTEDQA                           | 143 149 | AYFYPEL                           |
| 45 51 | GSESTED                               | 144 149 | YFYPEL                            |
| 45 69 | GSESTEDQAMEDIKQMEAESISSSE             | 154 161 | YQLDAYPS                          |
| 53 58 | AMEDIK                                | 154 164 | YQLDAYPSGAW                       |
| 54 79 | MEDIKQMEAESISSSEEIVPNSVEQK            | 155 161 | QLDAYPS                           |
| 55 63 | EDIKQMEAE                             | 157 164 | DAYPSGAW                          |
| 58 66 | KQMEAESIS                             | 160 168 | PSGAWYYVP                         |
| 59 64 | QMEAES                                | 160 181 | PSGAWYYVPLGTQYTDAPSFSD            |
| 60 66 | MEAESIS                               | 160 190 | PSGAWYYVPLGTQYTDAPSFSDIPNPIGSEN   |
| 64 75 | SISSSEEIVPNS                          | 161 170 | SGAWYYVPLG                        |
| 65 92 | ISSSEEIVPNSVEQKHQKEDVPSERYL           | 165 172 | YYVPLGTQ                          |
| 66 73 | SSSEEIVP                              | 165 179 | YYVPLGTQYTDAPSF                   |
| 69 77 | EEIVPNSVE                             | 166 196 | YVPLGTQYTDAPSFSDIPNPIGSENSEKTTM   |

| Range |     | Sequence              | Range |     | Sequence             |
|-------|-----|-----------------------|-------|-----|----------------------|
| 168   | 178 | PLGTQYTDAPS           | 177   | 183 | PSFSDIP              |
| 171   | 191 | TQYTDAPSFSDIPNPIGSENS | 178   | 186 | SFSDIPNPI            |
| 172   | 178 | QYTDAPS               | 179   | 187 | FSDIPNPIG            |
| 173   | 178 | YTDAPS                | 180   | 184 | SDIPN                |
| 173   | 179 | YTDAPSF               | 180   | 186 | SDIPNPI              |
| 173   | 181 | YTDAPSFSD             | 180   | 196 | SDIPNPIGSENSEKTTM    |
| 173   | 191 | YTDAPSFSDIPNPIGSENS   | 180   | 199 | SDIPNPIGSENSEKTTMPLW |
| 174   | 180 | TDAPSF                | 189   | 195 | ENSEKTT              |
| 174   | 186 | TDAPSFSDIPNPI         | 190   | 198 | NSEKTTMPL            |

**Table S3.**  $\beta$ -lactoglobulin-derived peptides identified in whey protein *in vitro* digests taken at 120 min of the gastric phase, and 30 and 120 min of the intestinal phase.

| Range | Sequence                    | Range | Sequence            |
|-------|-----------------------------|-------|---------------------|
| 1 8   | LIVTQTMK                    | 42 49 | YVEELKPT            |
| 1 10  | LIVTQTMKGL                  | 42 51 | YVEELKPTPE          |
| 1 14  | LIVTQTMKGLDIQK              | 42 54 | YVEELKPTPEGDL       |
| 2 6   | IVTQT                       | 42 55 | YVEELKPTPEGDLE      |
| 2 8   | IVTQTMK                     | 42 57 | YVEELKPTPEGDLEIL    |
| 2 9   | IVTQTMKG                    | 42 59 | YVEELKPTPEGDLEILLQ  |
| 2 10  | IVTQTMKGL                   | 42 60 | YVEELKPTPEGDLEILLQK |
| 2 11  | IVTQTMKGLD                  | 43 49 | VEELKPT             |
| 3 8   | VTQTMK                      | 43 51 | VEELKPTPE           |
| 4 11  | TQTMKGLD                    | 43 52 | VEELKPTPEG          |
| 6 12  | TMKGLDI                     | 43 54 | VEELKPTPEGDL        |
| 9 20  | GLDIQKVAGTWY                | 43 55 | VEELKPTPEGDLE       |
| 9 23  | GLDIQKVAGTWYSLA             | 43 57 | VEELKPTPEGDLEIL     |
| 10 18 | LDIQKVAGT                   | 44 51 | EELKPTPE            |
| 10 19 | LDIQKVAGTW                  | 44 54 | EELKPTPEGDL         |
| 11 19 | DIQKVAGTW                   | 44 60 | EELKPTPEGDLEILLQK   |
| 12 19 | IQKVAGTW                    | 45 51 | ELKPTPE             |
| 12 28 | IQKVAGTWYSLAMAASD           | 45 54 | ELKPTPEGDL          |
| 15 20 | VAGTWY                      | 45 55 | ELKPTPEGDLE         |
| 15 26 | VAGTWYSLAMAA                | 46 51 | LKPTPE              |
| 21 26 | SLAMAA                      | 46 54 | LKPTPEGDL           |
| 22 31 | LAMAASDISL                  | 47 51 | KPTPE               |
| 23 32 | AMAASDISLL                  | 47 55 | KPTPEGDLE           |
| 24 41 | MAASDISLLDAQSAPLRV          | 47 56 | KPTPEGDLEI          |
| 26 32 | ASDISLL                     | 48 56 | PTPEGDLEI           |
| 26 41 | ASDISLLDAQSAPLRV            | 50 55 | PEGDLE              |
| 27 32 | SDISLL                      | 55 62 | EILLQKWE            |
| 27 39 | SDISLLDAQSAPL               | 56 67 | ILLQKWENDECA        |
| 27 41 | SDISLLDAQSAPLRV             | 57 70 | LLQKWENDECAQKK      |
| 27 42 | SDISLLDAQSAPLRVY            | 58 69 | LQKWENDECAQK        |
| 28 54 | DISLLDAQSAPLRVYVEELKPTPEGDL | 58 74 | LQKWENDECAQKKIIAE   |
| 30 39 | SLLDAQSAPL                  | 60 66 | KWENDEC             |
| 30 41 | SLLDAQSAPLRV                | 60 67 | KWENDECA            |
| 32 38 | LDAQSAP                     | 61 66 | WENDEC              |
| 32 41 | LDAQSAPLRV                  | 61 67 | WENDECA             |
| 33 39 | DAQSAPL                     | 61 68 | WENDECAQ            |
| 33 40 | DAQSAPLR                    | 61 73 | WENDECAQKKIIA       |
| 33 41 | DAQSAPLRV                   | 62 67 | ENDECA              |
| 33 42 | DAQSAPLRVY                  | 63 69 | NDECAQK             |
| 34 38 | AQSAP                       | 68 76 | QKKIIAEKT           |
| 40 57 | RVYVEELKPTPEGDLEIL          | 69 77 | KKIIAEKTK           |
| 41 48 | VYVEELKP                    | 73 91 | AEKTKIPAVFKIDALNENK |
| 41 57 | VYVEELKPTPEGDLEIL           | 74 80 | EKTKIPA             |

| Range |     | Sequence             | Range |     | Sequence          |
|-------|-----|----------------------|-------|-----|-------------------|
| 74    | 82  | EKTKIPAVF            | 124   | 131 | RTPEVDDE          |
| 75    | 82  | KTKIPAVF             | 124   | 138 | RTPEVDDEALEKFDK   |
| 76    | 82  | TKIPAVF              | 125   | 130 | TPEVDD            |
| 77    | 82  | KIPAVF               | 125   | 131 | TPEVDDE           |
| 77    | 90  | KIPAVFKIDALNEN       | 125   | 132 | TPEVDDEA          |
| 82    | 91  | FKIDALNENK           | 125   | 134 | TPEVDDEALE        |
| 82    | 92  | FKIDALNENKV          | 125   | 135 | TPEVDDEALEK       |
| 83    | 89  | KIDALNE              | 125   | 136 | TPEVDDEALEKF      |
| 83    | 91  | KIDALNENK            | 125   | 137 | TPEVDDEALEKFD     |
| 83    | 92  | KIDALNENKV           | 125   | 138 | TPEVDDEALEKFDK    |
| 83    | 93  | KIDALNENKVL          | 125   | 139 | TPEVDDEALEKFDKA   |
| 83    | 102 | KIDALNENKVLVLDTDYKKY | 125   | 140 | TPEVDDEALEKFDKAL  |
| 85    | 91  | DALNENK              | 125   | 141 | TPEVDDEALEKFDKALK |
| 86    | 95  | ALNENKVLVL           | 126   | 131 | PEVDDE            |
| 89    | 97  | ENKVLVLDT            | 126   | 132 | PEVDDEA           |
| 90    | 95  | NKVLVL               | 126   | 133 | PEVDDEAL          |
| 92    | 100 | VLVLDTDYK            | 127   | 134 | EVDDEALE          |
| 92    | 101 | VLVLDTDYKK           | 127   | 135 | EVDDEALEK         |
| 96    | 102 | DTDYKKY              | 127   | 136 | EVDDEALEKF        |
| 96    | 103 | DTDYKKYL             | 128   | 133 | VDDEAL            |
| 96    | 104 | DTDYKKYLL            | 128   | 138 | VDDEALEKFDK       |
| 105   | 116 | FCMENSAEPEQS         | 129   | 141 | DDEALEKFDKALK     |
| 106   | 114 | CMENSAEPE            | 137   | 143 | DKALKAL           |
| 107   | 112 | MENSAE               | 142   | 148 | ALPMHIR           |
| 107   | 114 | MENSAEPE             | 148   | 156 | RLSFNPTQL         |
| 107   | 116 | MENSAEPEQS           | 148   | 160 | RLSFNPTQLEEQC     |
| 107   | 117 | MENSAEPEQSL          | 148   | 162 | RLSFNPTQLEEQCHI   |
| 107   | 118 | MENSAEPEQSLV         | 149   | 154 | LSFNPT            |
| 107   | 119 | MENSAEPEQSLVC        | 149   | 156 | LSFNPTQL          |
| 108   | 113 | ENSAEP               | 149   | 159 | LSFNPTQLEEQ       |
| 108   | 114 | ENSAEPE              | 149   | 160 | LSFNPTQLEEQC      |
| 108   | 116 | ENSAEPEQS            | 149   | 162 | LSFNPTQLEEQCHI    |
| 109   | 117 | NSAEPEQSL            | 150   | 154 | SFNPT             |
| 110   | 116 | SAEPEQS              | 150   | 156 | SFNPTQL           |
| 110   | 118 | SAEPEQSLV            | 150   | 159 | SFNPTQLEEQ        |
| 112   | 117 | EPEQSL               | 150   | 160 | SFNPTQLEEQC       |
| 112   | 121 | EPEQSLVCQC           | 150   | 162 | SFNPTQLEEQCHI     |
| 122   | 141 | LVRTPEVDDEALEKFDKALK | 152   | 162 | NPTQLEEQCHI       |
| 123   | 130 | VRTPEVDD             | 153   | 162 | PTQLEEQCHI        |
| 123   | 131 | VRTPEVDDE            | 154   | 161 | TQLEEQCH          |
| 123   | 132 | VRTPEVDDEA           | 155   | 159 | QLEEQ             |
| 123   | 133 | VRTPEVDDEAL          | 155   | 160 | QLEEQC            |
| 123   | 141 | VRTPEVDDEALEKFDKALK  | 156   | 161 | LEEQCH            |
| 124   | 130 | RTPEVDD              | 157   | 161 | EEQCH             |
|       |     |                      | 157   | 162 | EEQCHI            |



**Table S4.**  $\alpha$ -lactalbumin-derived peptides identified in whey proteins *in vitro* digests taken at 120 min of the gastric phase, and 30 and 120 min of the intestinal phase.

| Range |    | Sequence               | Range |     | Sequence                       |
|-------|----|------------------------|-------|-----|--------------------------------|
| 1     | 9  | EQLTKCEVF              | 59    | 64  | IWCKDD                         |
| 1     | 11 | EQLTKCEVFRE            | 59    | 73  | IWCKDDQNPSSNIC                 |
| 4     | 9  | TKCEVF                 | 61    | 68  | CKDDQNP                        |
| 8     | 14 | VFRELKD                | 62    | 77  | KDDQNPSSNICNISC                |
| 10    | 17 | RELKDLKG               | 62    | 79  | KDDQNPSSNICNISCDK              |
| 10    | 18 | RELKDLKGY              | 63    | 68  | DDQNP                          |
| 12    | 16 | LKDLK                  | 69    | 76  | SSNICNIS                       |
| 13    | 20 | KDLKGYGG               | 69    | 78  | SSNICNISCD                     |
| 15    | 35 | LKGYGGVSLPEWVCTTFHTSG  | 74    | 80  | NISCDKF                        |
| 19    | 25 | GGVSLPE                | 74    | 88  | NISCDKFLDDDLTDD                |
| 19    | 27 | GGVSLPEWV              | 75    | 88  | ISCDKFLDDDLTDD                 |
| 19    | 28 | GGVSLPEWVC             | 76    | 83  | SCDKFLDD                       |
| 19    | 29 | GGVSLPEWVCT            | 76    | 85  | SCDKFLDDDL                     |
| 19    | 30 | GGVSLPEWVCTT           | 80    | 97  | FLDDDLTDDIMCVKKILD             |
| 19    | 31 | GGVSLPEWVCTTF          | 81    | 87  | LDDDLTD                        |
| 19    | 35 | GGVSLPEWVCTTFHTSG      | 81    | 88  | LDDDLTDD                       |
| 19    | 36 | GGVSLPEWVCTTFHTSGY     | 82    | 88  | DDDLTDD                        |
| 19    | 40 | GGVSLPEWVCTTFHTSGYDTQA | 82    | 89  | DDDLTDDI                       |
| 21    | 30 | VSLPEWVCTT             | 83    | 89  | DDLTDI                         |
| 22    | 29 | SLPEWVCT               | 89    | 97  | IMCVKKILD                      |
| 24    | 28 | PEWVC                  | 89    | 103 | IMCVKKILDKVGINY                |
| 24    | 29 | PEWVCT                 | 90    | 103 | MCVKKILDKVGINY                 |
| 24    | 30 | PEWVCTT                | 91    | 103 | CVKKILDKVGINY                  |
| 24    | 31 | PEWVCTTF               | 92    | 99  | VKKILDKV                       |
| 24    | 35 | PEWVCTTFHTSG           | 92    | 121 | VKKILDKVGINYWLAHKALCSEKLDQWLCE |
| 24    | 39 | PEWVCTTFHTSGYDTQ       | 94    | 99  | KILDKV                         |
| 24    | 40 | PEWVCTTFHTSGYDTQA      | 94    | 103 | KILDKVGINY                     |
| 26    | 31 | WVCTTF                 | 95    | 103 | ILDKVGINY                      |
| 26    | 35 | WVCTTFHTSG             | 97    | 102 | DKVGIN                         |
| 30    | 40 | TFHTSGYDTQA            | 97    | 103 | DKVGINY                        |
| 32    | 39 | HTSGYDTQ               | 97    | 104 | DKVGINYW                       |
| 32    | 40 | HTSGYDTQA              | 98    | 103 | KVGINY                         |
| 40    | 49 | AIVQNNDSTE             | 104   | 117 | WLAHKALCSEKLDQ                 |
| 40    | 52 | AIVQNNDSTEYGL          | 105   | 117 | LAHKALCSEKLDQ                  |
| 41    | 48 | IVQNNDST               | 106   | 117 | AHKALCSEKLDQ                   |
| 41    | 49 | IVQNNDSTE              | 106   | 119 | AHKALCSEKLDQWL                 |
| 41    | 50 | IVQNNDSTEY             | 109   | 117 | ALCSEKLDQ                      |
| 41    | 51 | IVQNNDSTEYG            | 110   | 117 | LCSEKLDQ                       |
| 41    | 52 | IVQNNDSTEYGL           | 111   | 117 | CSEKLDQ                        |
| 45    | 51 | NDSTEYG                | 111   | 118 | CSEKLDQW                       |
| 53    | 57 | FQINN                  | 117   | 123 | QWLCEKL                        |
| 53    | 58 | FQINNK                 | 118   | 123 | WLCEKL                         |

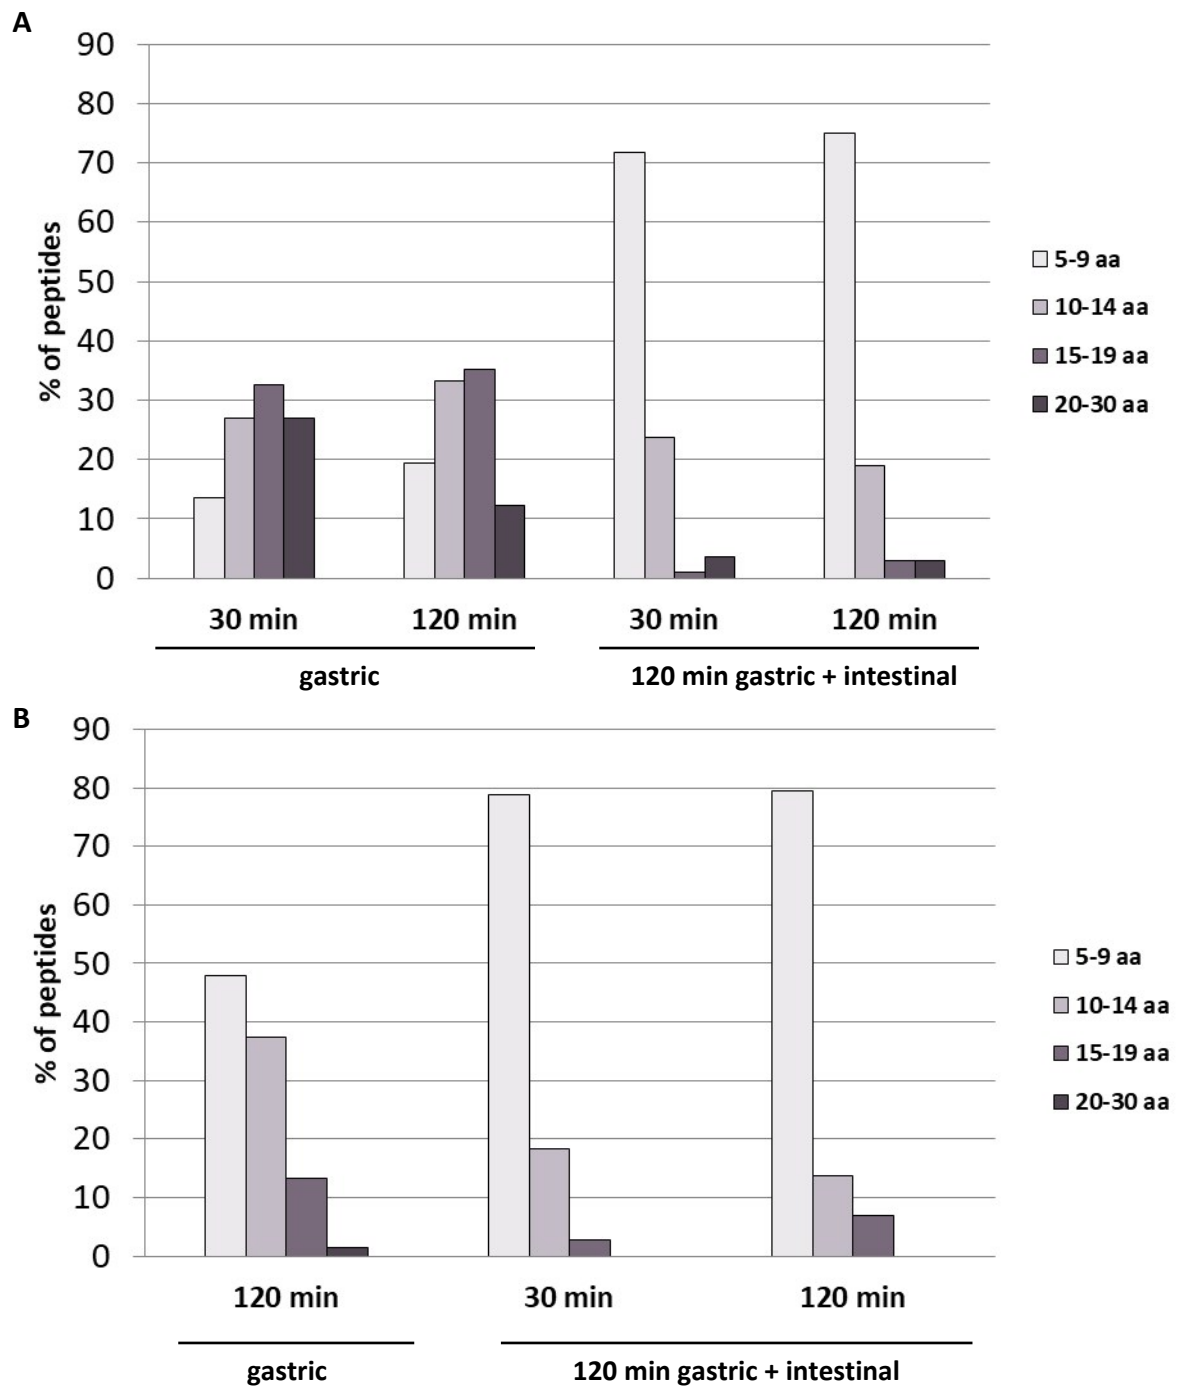

**Figure S2:** Size of peptides identified by HPLC-tandem mass spectrometry in (A) casein and (B) whey protein *in vitro* digests. The peptide size is expressed as number of amino acids (aa) and represented as percentage of the total identified peptides (y-axis) at each digestion time. Gastric digestion at 30 min is not shown due to the low hydrolysis degree in this sample. Each colour corresponds to a different peptide size range.

### 3. Comparison of CCK and GLP-1 secretion between *in vitro* and *in vivo* digests

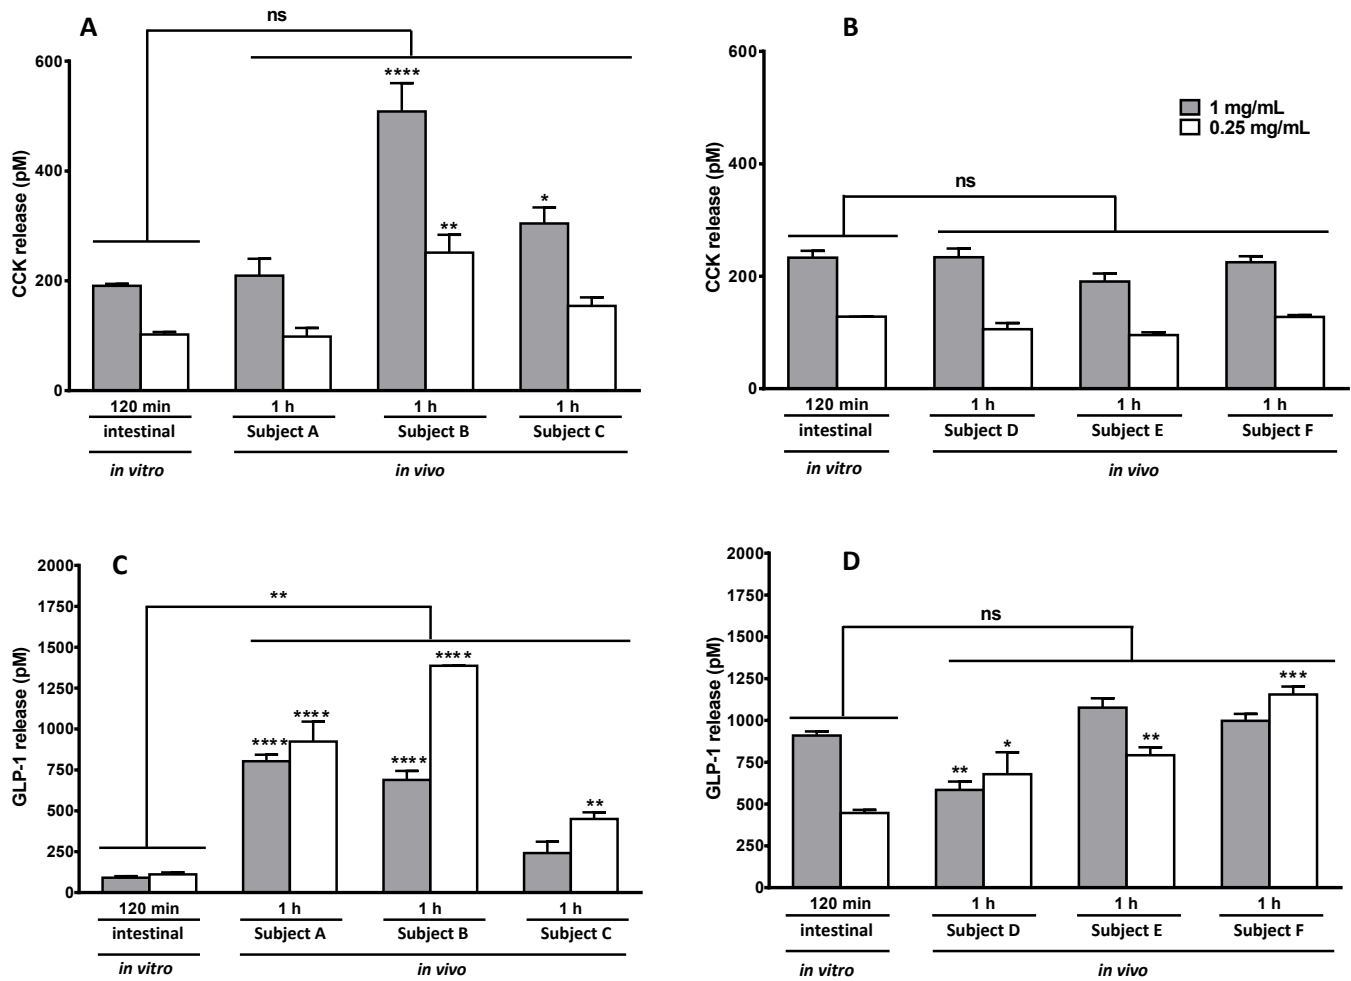

**Figure S3:** CCK secretion after 2 h incubation of STC-1 cells with (A) casein and (B) whey protein *in vitro* digests at the end of the digestion protocol (intestinal phase 120 min) and human jejunal effluents (*in vivo* digests) taken at 1 h after oral administration of the same substrates. Samples were incubated at two different protein concentrations, 1 and 0.25 mg/mL. GLP-1 secretion after 2 h incubation of STC-1 cells with (C) casein and (D) whey protein *in vitro* and *in vivo* digests. CCK and GLP-1 secretion was determined by ELISA. Error bars indicate SEM (n=3). Comparisons between samples tested at the same protein concentration and group comparisons were performed by two way ANOVA with Bonferroni post hoc test and is indicated by \*P < 0.05, \*\*P < 0.01, \*\*\*P < 0.001 and \*\*\*\*P < 0.0001.
